# Supplementary material for: The nucleobase–ascorbatetransporter (NAT) family: genomics, evolution, structure–function relationships and physiological role
Source: Royal Society of Chemistry journal article supplement (doi:10.1039/b719777b), 2008-03-11
Supplement: b719777b.pdf [file b719777b.pdf]

## Supplementary material

**Protein accession numbers:** UapA (CAA50681), UapC (CAA56190), Af UapC (XP\_748919.1), Xut1 (XP\_715594), *S. pombe* (NP\_593513), *U. maydis* (XP\_756223), YgfO (NP417358), YicE (NP418111), PbuX (NP390088), PucJ (Q32139), PucK (NP\_391124.1), UraA (D90878.1), PyrP (Z99112.2), hSVCT1 (AAF22490), hSVCT2 (ABK34450), *M. musculus* 1 (NP\_035527.3), *M. musculus* 2 (NP\_061294.2), *M. domestica* 1 (XP\_001374069), *M. domestica* 2 (XP\_001376442.1), *M. domestica* 3 (XP\_001381713.1), *G. gallus* (XP\_416178.2), *G. gallus* (XP\_417671.2), *X. tropicalis* 1 (ENSXETP00000036732), *X. tropicalis* 2 (ENSXETP00000018416), *X. tropicalis* 3 (ENSXETP00000043654), *D. rerio* (NP\_001013353.1), *T. nigroviridis* (GSTENP00016721001), *T. rubripes* (SINFRUP00000151988), *T. rubripes* (SINFRUP00000128512), *S. purpuratus* 1 (XP\_786798.2), *S. purpuratus* 2 (XP\_783160.2), *T. pseudonana* (gw1.23.17.1), *R. norvegicus* 1 (XP\_231601.4), *R. norvegicus* 2 (NP\_059012), *A. mellifera* (XP\_623912.1), *D. melanogaster* (NP\_649994.1), *A. gambiae* (NT\_078266.2), *C. elegans* (NP\_505613.1), *D. discoideum* (XP\_642632.1), *M. mulatta* 1 (XP\_001115608.1), *M. mulatta* 2 (XP\_001082198.1), *B. taurus* (XP\_581784.3), *C. familiaris* (NP\_001103427.1), *F. catus* (GENSCAN00000013567), *S. scrofa* (NP\_999343.1), *O. s. japonica* (NP\_001063058.1), *A. thaliana* (NP\_199810.2), *Z. mays* Lpe1 (Q41760).
